# Supplementary material for: Impact of the WHO FCTC over the first decade: a global evidence review prepared for the Impact Assessment Expert Group
Source: PubMed Central journal article supplement (PMC6589489; doi:10.1136/tobaccocontrol-2018-054389), 2018-06-07
Supplement: tobaccocontrol-2018-054389supp002.pdf [file tobaccocontrol-2018-054389supp002.pdf]

**Table S2.** Panel of consulted tobacco control experts

| <b>Tobacco Control Expert</b> | <b>Affiliation</b>                                                   |
|-------------------------------|----------------------------------------------------------------------|
| Dr. Gary J. Fooks             | Aston University                                                     |
| Dr. Anna B. Gilmore           | University of Bath                                                   |
| Dr. Richard O'Connor          | Roswell Park Cancer Institute                                        |
| Rob Cunningham                | Canadian Cancer Society                                              |
| Dr. Martin Raw                | International Centre for Tobacco Cessation, University of Nottingham |
| Dr. Jeffrey Drope             | American Cancer Society                                              |
| Dr. Natacha Lecours           | International Development Research Centre                            |
