# Supplementary material for: Impact of the WHO FCTC over the first decade: a global evidence review prepared for the Impact Assessment Expert Group
Source: PubMed Central journal article supplement (PMC6589489; doi:10.1136/tobaccocontrol-2018-054389), 2018-06-07
Supplement: tobaccocontrol-2018-054389supp003.pdf [file tobaccocontrol-2018-054389supp003.pdf]

**Table S3.** Summary of key findings from 128 studies on the impact of FCTC policies.

| <b>FCTC Article</b>                                                                                                                                          | <b>Policy evaluation</b>     | <b>Source</b>                                                                                                                                                                         | <b>Key findings on policy impact</b>                                 | <b>Overall evidence for policy effectiveness</b> |
|--------------------------------------------------------------------------------------------------------------------------------------------------------------|------------------------------|---------------------------------------------------------------------------------------------------------------------------------------------------------------------------------------|----------------------------------------------------------------------|--------------------------------------------------|
| <b>Article 5.3 – Protection of public health policies with respect to tobacco control from commercial and other vested interests of the tobacco industry</b> | n/a                          | n/a                                                                                                                                                                                   | n/a                                                                  | None to date                                     |
| <b>Article 6 – Price and tax measures to reduce the demand for tobacco</b>                                                                                   | Cigarette tax increase       | Warren et al.[85]<br>WHO Convention Secretariat [22]                                                                                                                                  | Decrease in cigarette sales                                          | Strong                                           |
|                                                                                                                                                              |                              | Yürekli et al.[86]<br>Waters et al. [87]                                                                                                                                              | Increase in government tax revenues                                  |                                                  |
|                                                                                                                                                              |                              | Van Walbeek [88]<br>Dorotheo et al. [44]<br>WHO Convention Secretariat [22]                                                                                                           | Decrease in smoking prevalence                                       |                                                  |
| <b>Article 8 – Protection from exposure to tobacco smoke</b>                                                                                                 | Comprehensive smoke-free law | WHO WPR & ITC Project [89]<br>Fong et al. [90] [91]<br>Cooper et al. [92]                                                                                                             | Reduction in smoking in indoor public places                         | Strong                                           |
|                                                                                                                                                              |                              | Brennan et al. [93]<br>Avila-Tang et al. [94]<br>Connolly et al. [95]<br>Hyland et al. [96]                                                                                           | Reduction in levels of air pollutants and improvement in air quality |                                                  |
|                                                                                                                                                              |                              | Goodman et al. [97]<br>Frazer et al. [13]<br>Stallings-Smith et al. [98]<br>Sebrié et al. [99]<br>Sebrié et al. [100]<br>Pell et al. [101]<br>Tan & Glantz [102]<br>Been et al. [103] | Improvement in health outcomes                                       |                                                  |
|                                                                                                                                                              |                              | Fowkes et al. [104]<br>Fong et al. [90]                                                                                                                                               | Increase in quitting among smokers                                   |                                                  |
| <b>Article 9 – Regulation of the contents of tobacco products</b>                                                                                            | n/a                          | n/a                                                                                                                                                                                   | n/a                                                                  | None to date                                     |
| <b>Article 10 – Regulation of tobacco product disclosures</b>                                                                                                | n/a                          | n/a                                                                                                                                                                                   | n/a                                                                  | None to date                                     |

| FCTC Article                                                    | Policy evaluation                      | Source                                                                                                                                                                                                                                | Key findings on policy impact                                                                                                                                                                                                                                                                                                                                                                                                                                                                                                                                                                                                                           | Overall evidence for policy effectiveness |
|-----------------------------------------------------------------|----------------------------------------|---------------------------------------------------------------------------------------------------------------------------------------------------------------------------------------------------------------------------------------|---------------------------------------------------------------------------------------------------------------------------------------------------------------------------------------------------------------------------------------------------------------------------------------------------------------------------------------------------------------------------------------------------------------------------------------------------------------------------------------------------------------------------------------------------------------------------------------------------------------------------------------------------------|-------------------------------------------|
| <b>Article 11 – Packaging and labelling of tobacco products</b> | Large pictorial health warnings (>50%) | Gravely et al. [105]                                                                                                                                                                                                                  | Increase in adult smokers’ noticing and reading warnings; thinking about risks of smoking; thinking about quitting; avoiding warnings; and forgoing a cigarette                                                                                                                                                                                                                                                                                                                                                                                                                                                                                         | Strong                                    |
|                                                                 | Pictorial (graphic) health warnings    | Hammond [106]<br><br>Hammond et al. [107]<br>Hammond et al. [108]<br><br>Hammond et al. [109]<br><br>Huang et al. [110]<br><br>Hammond et al. [111]<br><br>Borland et al. [112]<br><br>ITC Project [113]<br>Fathelrahman et al. [114] | Increase in adult smokers’ noticing of warnings and cessation behaviour; and decrease in uptake of smoking among youth<br><br>Promotes cessation among adult smokers<br><br>Pictorial warnings perceived by adult and youth smokers as more realistic and effective vs. illustrations/cartoons<br><br>Decrease in adult smoking prevalence<br><br>Increase in adult smokers’ knowledge of harms of smoking<br><br>Increase in adult smokers’ noticing of warnings, thinking about health risks and quitting, forgoing cigarettes, and avoiding warnings<br><br>Increase in adult smokers’ thinking about health risks of smoking and quitting behaviour |                                           |

| FCTC Article                                                                 | Policy evaluation                                                   | Source                                                                                                                                                                                                                                                                                                     | Key findings on policy impact                                                                                                                                                                                                                                                                  | Overall evidence for policy effectiveness               |
|------------------------------------------------------------------------------|---------------------------------------------------------------------|------------------------------------------------------------------------------------------------------------------------------------------------------------------------------------------------------------------------------------------------------------------------------------------------------------|------------------------------------------------------------------------------------------------------------------------------------------------------------------------------------------------------------------------------------------------------------------------------------------------|---------------------------------------------------------|
|                                                                              |                                                                     | Chiosi et al. [115]                                                                                                                                                                                                                                                                                        | Greater knowledge of harms of smoking among adult smokers                                                                                                                                                                                                                                      |                                                         |
|                                                                              | Inclusion of quitline number on cigarette packaging                 | Miller et al. [116]<br>Grigg [117]<br>Wilson et al. [118]                                                                                                                                                                                                                                                  | Increase in use of national quitlines                                                                                                                                                                                                                                                          |                                                         |
|                                                                              | Plain packaging for cigarettes                                      | British Heart Foundation & ITC Project [119]<br>Hammond [120]<br>Chantler [121]<br>Moodie et al. [122]<br>Wakefield et al. [123]<br>Yong et al. [124]<br>Dunlop et al. [125]<br>Durkin et al. [126]<br>Young et al. [127]<br><br>Australian Department of Health [128]<br>Kmietowicz [129]                 | Reduces false health beliefs; increases noticeability of health warnings; enhances cognitive processing of health warnings; greater avoidance of warnings; reduces appeal of packaging; reduces consumer demand; and/or promotes smoking cessation<br><br>Decrease in adult smoking prevalence |                                                         |
| <b>Article 12 – Education, communication, training, and public awareness</b> | Mass media campaigns on dangers of smoking and benefits of quitting | Bauer et al. [162]<br>Niederdeppe et al. [163]<br>Weiss et al. [164]<br><br>Brinn et al. [165]<br><br>Flynn et al. [166]<br>Bauer et al. [162]<br>Farrelly et al. [167]<br>Niederdeppe et al. [163]<br>Wakefield & Chaloupka [168]<br>Goldman & Glantz [169]<br>Siegel & Biener [170]<br>Emery et al [171] | Prevention of smoking initiation among youth<br><br>Mass media campaigns most effective at preventing smoking among youth when conducted over a minimum 3 year period<br><br>Decrease in youth smoking prevalence                                                                              | Strong but limited to research in high-income countries |

| <b>FCTC Article</b>                                                                       | <b>Policy evaluation</b>                                  | <b>Source</b>                                                                                                                                                                                          | <b>Key findings on policy impact</b>                                                                                   | <b>Overall evidence for policy effectiveness</b> |
|-------------------------------------------------------------------------------------------|-----------------------------------------------------------|--------------------------------------------------------------------------------------------------------------------------------------------------------------------------------------------------------|------------------------------------------------------------------------------------------------------------------------|--------------------------------------------------|
|                                                                                           |                                                           | Sly et al. [172]<br>Farrelly et al. [173]<br><br>Popham et al. [174]<br>White et al. [175]                                                                                                             | Promotes anti-tobacco attitudes/beliefs among youth<br><br>Promotes smoking cessation among youth                      |                                                  |
| <b>Article 13 – Tobacco advertising, promotion, and sponsorship</b>                       | Comprehensive TAPS ban                                    | ITC Project [130,131]<br>Caixeta et al. [132]<br>Harris et al. [133]<br>Kasza et al. [134]<br>Li et al. [135]<br>McNeill et al. [136]<br><br>Saffer & Chaloupka [137]<br>Blecher [138]<br>Saffer [139] | Reduction in public exposure to tobacco marketing<br><br><br><br><br><br>Decrease in tobacco consumption               | Strong                                           |
|                                                                                           | POS advertising and promotion ban                         | National Cancer Institute [140]<br>Paynter & Edwards [141]                                                                                                                                             | Prevention of smoking initiation among youth                                                                           |                                                  |
|                                                                                           | POS display ban                                           | Spanopoulos et al. [142]<br>McNeill et al. [136]<br>Scheffels & Lavik [143]                                                                                                                            | Prevention of smoking initiation among youth                                                                           |                                                  |
| <b>Article 14 – Demand reduction measures concerning tobacco dependence and cessation</b> | Advice from physicians                                    | West et al. [144]                                                                                                                                                                                      | Promotes smoking cessation                                                                                             | Strong                                           |
|                                                                                           | Training on cessation techniques for health professionals | Carson et al. [145]<br>Warren et al. [146]                                                                                                                                                             | Increase in provision of cessation treatments among trained professionals; increase in quitting among advised patients |                                                  |
|                                                                                           | Use of NRT and stop smoking medications                   | West et al. [144]<br>Cooper et al. [147]<br>Kasza et al. [148]                                                                                                                                         | Increase in quitting among smokers who use NRT, bupropion, varenicline, cytisine, or nortriptyline                     |                                                  |
|                                                                                           | Telephone-based quitlines                                 | Pine-Abata et al. [79]<br>Ossip-Klein & McIntosh [149]<br>Stead et al. [150]<br>Anderson & Zhu [151]<br>West et al [144]                                                                               | Increase in quitline usage and quitting behaviour                                                                      |                                                  |

| FCTC Article                                          | Policy evaluation                                                                      | Source                                                                                                                                                     | Key findings on policy impact                                                                                                                                                       | Overall evidence for policy effectiveness               |
|-------------------------------------------------------|----------------------------------------------------------------------------------------|------------------------------------------------------------------------------------------------------------------------------------------------------------|-------------------------------------------------------------------------------------------------------------------------------------------------------------------------------------|---------------------------------------------------------|
|                                                       |                                                                                        | Miller et al. [152]<br>Abdullah et al. [153]                                                                                                               |                                                                                                                                                                                     |                                                         |
|                                                       | Behavioural cessation support                                                          | West et al. [144]<br>Bauld et al. [154]<br>Dobbie et al. [155]                                                                                             | Increase in quitting                                                                                                                                                                |                                                         |
|                                                       | Integration of cessation interventions                                                 | Mullen et al. [156]<br><br>Gibson et al. [157]<br><br>Ferguson et al. [158]<br>Judge et al. [159]<br>Brose et al. [160]                                    | Increase in long-term quitting, and reduction in mortality risk<br><br>Increase in smokers' quit attempts, use of treatments, and short-term abstinence<br><br>Increase in quitting |                                                         |
|                                                       | Cost coverage for stop smoking medications                                             | Cooper et al. [147]<br>West et al. [161]                                                                                                                   | Increase in use of stop smoking medications among smokers who tried to quit                                                                                                         |                                                         |
| <b>Article 15 – Illicit trade in tobacco products</b> | Comprehensive measures to interrupt supply chain from manufacturers to illegal markets | HM Revenue & Customs [186]<br><br>Joossens & Raw [187]<br>Joossens [188]                                                                                   | Decrease in illicit cigarette trade<br><br>Reduction in market share of contraband cigarettes                                                                                       |                                                         |
|                                                       | Track and trace systems to monitor production and distribution chain                   | World Health Organization [33]                                                                                                                             | Decrease in illegal production of cigarettes; increase in seizures of illegal tobacco products                                                                                      |                                                         |
| <b>Article 16 – Sales to and by minors</b>            | Ban sale of tobacco to minors                                                          | Huang et al. [176]<br>Levinson & Mickiewicz [177]<br>Tutt et al. [178]<br>Verdonk-Kleinjan et al. [179]<br><br>Jason et al. [180]<br>DiFranza et al. [181] | Decrease in youth access to cigarettes<br><br><br><br><br>Reduction in youth smoking                                                                                                | Strong but limited to research in high-income countries |
|                                                       | Raising legal age of purchase                                                          | Staff et al. [182]                                                                                                                                         | Reduction in youth smoking                                                                                                                                                          |                                                         |

| FCTC Article                                                                  | Policy evaluation                                                                                                                  | Source                                                                                                                                                                                                                  | Key findings on policy impact                                                                                                                                                                                | Overall evidence for policy effectiveness |
|-------------------------------------------------------------------------------|------------------------------------------------------------------------------------------------------------------------------------|-------------------------------------------------------------------------------------------------------------------------------------------------------------------------------------------------------------------------|--------------------------------------------------------------------------------------------------------------------------------------------------------------------------------------------------------------|-------------------------------------------|
|                                                                               | Implementation of measures to limit youth access to tobacco products in conjunction with other tobacco control programmes/policies | Gendall et al. [183]<br>Friend et al. [184]<br>Lantz et al. [185]                                                                                                                                                       | Prevention and reduction of tobacco use among youth                                                                                                                                                          |                                           |
| <b>Article 17 – Provision of support for economically viable alternatives</b> | Alternative crop programmes                                                                                                        | Akhter et al. [189]<br><br>Li et al. [190]<br>Kibwage et al. [191]<br>Kenya Tobacco Control Research Group [192]<br>Magati et al. [193]<br>Keyser [194]<br>Keyser & Lungu [195]<br>Molla [196]<br>Vargas & Campos [197] | Lower food security for tobacco farmers vs. alternative crop farmers<br><br>Increase in net profit for alternative crop farmers vs. tobacco farmers                                                          | Limited                                   |
| <b>Article 18 – Protection of environment and health of persons</b>           | Use of personal protective equipment                                                                                               | Ballard et al. [198]<br>Hipke [199]<br>Gehlbach et al [200]<br>Ghosh et al. [201] [202]<br>Arcury et al. [203]<br>Onuki et al. [204]                                                                                    | Prevention of green tobacco sickness among tobacco workers                                                                                                                                                   | Limited                                   |
|                                                                               | Education campaigns on risks of tobacco harvesting                                                                                 | Ballard et al. [198]                                                                                                                                                                                                    | Increase in incidence of hospital-treated green tobacco sickness                                                                                                                                             |                                           |
| <b>Article 19 - Liability</b>                                                 | Use of FCTC in legislation and litigation                                                                                          | Muggli et al. [52]                                                                                                                                                                                                      | Reference to and/or incorporation of FCTC into legislative objectives, definitions, and/or substantive provisions by at least 51 jurisdictions; reference to FCTC in litigation by at least 27 jurisdictions | Strong                                    |

| FCTC Article                                                                                                      | Policy evaluation                 | Source                                        | Key findings on policy impact                                                                                                                                                                                                        | Overall evidence for policy effectiveness |
|-------------------------------------------------------------------------------------------------------------------|-----------------------------------|-----------------------------------------------|--------------------------------------------------------------------------------------------------------------------------------------------------------------------------------------------------------------------------------------|-------------------------------------------|
|                                                                                                                   |                                   | McCabe Centre for Law and Cancer & CTFK [205] | Use of FCTC to defend against legal challenges to tobacco control measures; require governments to implement stronger tobacco control measures; and defend tobacco control measures in international trade and investment challenges |                                           |
| <b>Article 20 – Research, surveillance, and exchange of information</b>                                           | Regular monitoring of tobacco use | Dubray et al. [10]                            | Decrease in tobacco smoking over time                                                                                                                                                                                                | Limited                                   |
| <b>Article 21 – Reporting and information exchange</b>                                                            | n/a                               | n/a                                           | n/a                                                                                                                                                                                                                                  | None to date                              |
| <b>Article 22 – Cooperation in the scientific, technical, and legal fields and provision of related expertise</b> | n/a                               | n/a                                           | n/a                                                                                                                                                                                                                                  | None to date                              |
